# Supplementary material for: A functional magnetic resonance imaging investigation of the autonomous sensory meridian response
Source: PeerJ. 2019 Jun 21;7:e7122. doi: 10.7717/peerj.7122 (PMC6590446; doi:10.7717/peerj.7122)
Supplement: Supplemental Information 1 [file peerj-07-7122-s001.xlsx]

## Sheet: Sheet1
11-1-10000		(Please see line 3774 for the voxel-by-voxel results of the next analysis)
DETAILS FOR VOI "Cluster 1"
RandomEffectsAnalysis: No
TypeOfStatistic: t(99)
NrOfVoxels: 343
AbsStatMinValue: 2.628534
AbsStatMaxValue: 3.948955
AvgStatValue: 2.934171
AvgPValue: 0.005126
StatWeightedMass: 1006.420532
PWeightedMass: 1.758071
ListOfVOIVoxels:
x y z StatValue p
------------------------------------------
57 -19 42 2.768410 0.006725
57 -20 42 2.931893 0.004185
56 -19 42 2.768410 0.006725
56 -20 42 2.931893 0.004185
56 -19 43 2.768410 0.006725
55 -19 42 2.889815 0.004737
55 -18 42 2.734886 0.007395
55 -20 42 3.044744 0.002984
55 -19 43 2.811965 0.005938
54 -19 42 3.011219 0.003302
54 -18 42 2.864844 0.005095
54 -20 42 3.157595 0.002109
54 -19 43 2.847602 0.005357
53 -19 42 3.132624 0.002279
53 -18 42 2.994802 0.003469
53 -20 42 3.270446 0.001478
53 -19 43 2.877299 0.004913
53 -19 41 2.714535 0.007831
53 -20 41 2.830642 0.005626
54 -20 41 2.714165 0.007839
53 -18 43 2.868591 0.005040
53 -20 43 2.884072 0.004817
54 -20 43 2.896027 0.004651
55 -20 43 2.911399 0.004446
55 -21 43 2.716016 0.007798
55 -20 44 2.671375 0.008833
56 -20 43 2.931893 0.004185
56 -21 43 2.912621 0.004430
56 -22 43 2.893348 0.004688
56 -21 42 2.912621 0.004430
56 -22 42 2.893348 0.004688
57 -21 42 2.912621 0.004430
55 -21 42 2.867056 0.005062
55 -22 42 2.689368 0.008402
54 -21 42 2.821491 0.005777
53 -21 42 2.775926 0.006583
57 -22 42 2.893348 0.004688
57 -23 42 2.874075 0.004960
56 -23 42 2.874075 0.004960
56 -23 43 2.874075 0.004960
53 -17 43 2.856980 0.005213
53 -18 44 2.641410 0.009596
54 -18 43 2.789492 0.006333
54 -17 43 2.718468 0.007745
55 -18 43 2.702066 0.008109
54 -17 42 2.718468 0.007745
54 -16 42 2.662901 0.009043
53 -17 42 2.856980 0.005213
53 -16 42 2.823716 0.005740
53 -15 42 2.790452 0.006315
53 -14 42 2.757189 0.006943
53 -13 42 3.060634 0.002843
53 -12 42 3.364078 0.001094
53 -13 43 2.657578 0.009177
54 -13 42 2.830707 0.005625
52 -13 42 2.807373 0.006016
52 -12 42 3.195949 0.001871
52 -11 42 3.584528 0.000526
52 -12 43 3.017799 0.003237
51 -12 42 3.027820 0.003141
51 -11 42 3.501532 0.000696
51 -12 43 2.988149 0.003539
50 -12 42 2.859691 0.005172
50 -11 42 3.418536 0.000915
50 -12 43 2.958498 0.003867
49 -12 42 2.646502 0.009462
49 -11 42 3.133939 0.002270
49 -12 43 2.706690 0.008005
49 -11 43 3.225666 0.001704
49 -12 44 2.766879 0.006754
49 -11 44 3.317394 0.001272
49 -12 45 2.827067 0.005685
50 -12 44 3.057306 0.002872
50 -11 44 3.678894 0.000381
50 -12 45 3.156114 0.002119
51 -12 44 2.948477 0.003984
51 -11 44 3.521636 0.000650
51 -12 45 2.908806 0.004480
52 -12 44 2.839648 0.005482
52 -11 44 3.364378 0.001092
52 -12 45 2.661498 0.009078
53 -12 44 2.730819 0.007480
53 -11 44 3.207120 0.001806
53 -12 43 3.047449 0.002959
54 -12 44 2.699772 0.008161
54 -11 44 3.207120 0.001806
54 -12 43 2.956797 0.003887
54 -11 43 3.437322 0.000861
54 -12 42 3.189342 0.001910
54 -11 42 3.667524 0.000396
54 -12 41 2.646688 0.009457
55 -12 42 2.874817 0.004949
54 -11 41 2.846546 0.005373
53 -12 41 2.788183 0.006356
53 -11 41 2.972732 0.003706
53 -10 41 2.780023 0.006506
53 -11 42 3.667524 0.000396
52 -11 41 2.868583 0.005040
52 -10 41 2.797629 0.006187
51 -11 41 2.764435 0.006802
51 -10 41 2.815235 0.005882
50 -11 41 2.660287 0.009109
50 -10 41 2.832841 0.005591
50 -9 41 3.005395 0.003361
50 -10 42 3.595342 0.000507
49 -10 41 2.717604 0.007764
49 -9 41 2.908167 0.004488
49 -10 42 3.309133 0.001306
49 -9 42 3.484326 0.000737
49 -10 43 3.155798 0.002121
48 -10 42 3.022923 0.003188
48 -9 42 3.196504 0.001867
48 -11 42 2.849342 0.005330
48 -10 43 2.879925 0.004876
47 -10 42 2.736713 0.007357
47 -9 42 2.908681 0.004481
47 -8 42 3.080650 0.002674
47 -9 43 2.628534 0.009942
47 -9 41 2.713711 0.007849
47 -8 41 2.940293 0.004082
48 -9 41 2.810939 0.005955
48 -8 41 3.019512 0.003221
48 -7 41 2.916939 0.004374
48 -8 42 3.370085 0.001072
48 -8 40 2.668938 0.008893
49 -8 41 3.098731 0.002530
49 -7 41 3.020115 0.003215
49 -8 42 3.659520 0.000407
50 -8 41 3.177950 0.001979
50 -7 41 3.123291 0.002346
50 -8 42 3.948955 0.000147
51 -8 41 2.916835 0.004375
51 -7 41 2.818963 0.005819
51 -9 41 2.866035 0.005077
51 -8 42 3.633936 0.000445
52 -8 41 2.655720 0.009225
52 -9 41 2.726675 0.007568
52 -8 42 3.318919 0.001265
52 -7 42 2.983243 0.003592
52 -9 42 3.407455 0.000949
52 -8 43 2.892048 0.004706
53 -8 42 3.003900 0.003376
53 -7 42 2.631207 0.009869
53 -9 42 3.225109 0.001707
53 -8 43 2.739277 0.007304
53 -9 43 2.971960 0.003715
53 -10 43 3.204640 0.001820
53 -9 44 2.718810 0.007737
54 -9 43 2.727168 0.007558
52 -9 43 3.086183 0.002629
52 -10 43 3.280318 0.001432
52 -9 44 2.764910 0.006792
51 -9 43 3.200407 0.001845
51 -8 43 3.044817 0.002983
51 -10 43 3.355995 0.001123
51 -9 44 2.811011 0.005954
51 -9 42 3.589802 0.000517
50 -9 43 3.314630 0.001283
50 -8 43 3.197588 0.001861
50 -10 43 3.431672 0.000877
50 -9 44 2.857111 0.005211
50 -9 42 3.772148 0.000276
49 -9 43 3.085931 0.002631
49 -8 43 3.016064 0.003254
49 -9 44 2.687536 0.008445
48 -9 43 2.857233 0.005209
48 -8 43 2.834540 0.005563
47 -8 43 2.653016 0.009294
49 -10 44 3.002464 0.003390
49 -10 45 2.849130 0.005333
50 -10 44 3.268001 0.001490
48 -10 44 2.736927 0.007353
48 -11 44 2.955894 0.003897
48 -11 45 3.009170 0.003323
48 -11 43 2.902618 0.004562
49 -11 45 3.409121 0.000944
49 -11 46 2.808099 0.006004
50 -11 45 3.809072 0.000242
50 -10 45 3.104331 0.002487
50 -11 46 3.148347 0.002170
51 -11 45 3.531687 0.000629
51 -10 45 2.976650 0.003663
51 -11 46 3.105490 0.002478
52 -11 45 3.254303 0.001556
52 -10 45 2.848970 0.005336
52 -11 46 3.050389 0.002933
53 -11 45 2.976919 0.003660
53 -10 45 2.721289 0.007684
53 -11 46 2.976919 0.003660
54 -11 45 2.976919 0.003660
54 -10 45 2.721289 0.007684
54 -10 44 2.892577 0.004699
54 -10 43 3.046737 0.002966
53 -10 44 2.962964 0.003816
52 -10 44 3.064643 0.002808
51 -10 44 3.166322 0.002052
54 -10 42 3.186214 0.001929
54 -9 42 2.825233 0.005715
55 -10 42 2.718032 0.007754
53 -10 42 3.446316 0.000835
52 -10 42 3.495991 0.000708
51 -10 42 3.545667 0.000600
53 -10 46 2.721289 0.007684
52 -11 47 2.683340 0.008544
50 -12 46 2.656801 0.009197
49 -7 43 2.747075 0.007145
49 -7 42 3.421001 0.000908
50 -7 43 2.926539 0.004252
50 -6 43 2.655491 0.009230
50 -7 42 3.687315 0.000370
51 -7 43 2.770921 0.006677
51 -7 42 3.335279 0.001200
51 -6 42 3.036623 0.003058
51 -5 42 2.737966 0.007331
51 -6 41 2.721093 0.007688
52 -6 42 2.647570 0.009434
50 -6 42 3.425677 0.000894
50 -5 42 3.164037 0.002067
50 -6 41 3.068632 0.002774
49 -6 42 3.182484 0.001951
49 -5 42 2.943965 0.004038
49 -6 41 2.941499 0.004067
48 -6 42 2.939291 0.004094
48 -5 42 2.723894 0.007628
48 -7 42 3.154687 0.002128
48 -6 41 2.814367 0.005897
47 -6 42 2.696098 0.008246
47 -7 42 2.888373 0.004757
47 -6 41 2.687234 0.008452
47 -7 41 2.813763 0.005907
47 -6 40 2.678370 0.008663
47 -7 40 2.739153 0.007306
47 -6 39 2.669507 0.008879
48 -6 40 2.689442 0.008400
48 -5 40 2.699695 0.008163
48 -7 40 2.679190 0.008643
49 -6 40 2.700514 0.008144
49 -5 40 2.781802 0.006473
50 -6 40 2.711586 0.007896
50 -5 40 2.863909 0.005109
50 -4 40 2.806144 0.006038
50 -5 41 3.013973 0.003275
50 -5 39 2.713845 0.007846
50 -4 39 2.811779 0.005941
49 -5 39 2.700720 0.008140
49 -4 39 2.774880 0.006602
48 -5 39 2.687595 0.008444
48 -4 39 2.737980 0.007331
47 -5 39 2.674470 0.008758
47 -4 39 2.701081 0.008132
47 -3 39 2.727692 0.007546
47 -2 39 2.754303 0.007000
48 -3 39 2.788366 0.006353
48 -2 39 2.838751 0.005496
48 -3 38 2.646507 0.009462
49 -3 39 2.849039 0.005335
49 -2 39 2.923199 0.004294
49 -3 40 2.674414 0.008759
49 -3 38 2.700741 0.008139
50 -3 39 2.909713 0.004468
50 -2 39 3.007647 0.003338
50 -3 40 2.748380 0.007118
50 -3 38 2.754976 0.006987
51 -3 39 2.890245 0.004731
51 -2 39 3.138503 0.002238
51 -4 39 2.641989 0.009581
51 -3 40 2.694373 0.008285
51 -3 38 2.741682 0.007255
52 -3 39 2.870778 0.005008
52 -2 39 3.269358 0.001483
52 -3 40 2.640367 0.009624
52 -3 38 2.728388 0.007532
53 -3 39 2.851310 0.005300
53 -2 39 3.400213 0.000972
53 -3 38 2.715094 0.007819
54 -3 39 2.825592 0.005709
54 -2 39 3.400213 0.000972
54 -3 38 2.669553 0.008878
55 -3 39 2.779300 0.006520
54 -2 38 3.084258 0.002645
54 -1 38 2.675335 0.008737
54 -2 37 2.768302 0.006727
53 -2 38 3.084258 0.002645
53 -1 38 2.675335 0.008737
53 -2 37 2.768302 0.006727
52 -2 38 3.023147 0.003185
52 -2 37 2.776935 0.006564
51 -2 38 2.962036 0.003826
51 -2 37 2.785568 0.006404
50 -2 38 2.900925 0.004585
50 -2 37 2.794202 0.006248
49 -2 38 2.825722 0.005707
49 -2 37 2.728244 0.007535
48 -2 38 2.750519 0.007075
48 -2 37 2.662286 0.009058
47 -2 38 2.675316 0.008737
49 -2 36 2.630766 0.009881
50 -2 36 2.687479 0.008446
53 -1 39 3.062286 0.002829
53 0 39 2.724360 0.007618
53 -1 40 2.844316 0.005408
54 -1 39 3.062286 0.002829
52 -1 39 2.865083 0.005092
52 -1 40 2.642897 0.009557
51 -1 39 2.667880 0.008919
52 -2 40 2.884028 0.004818
53 -2 40 2.980735 0.003619
51 -2 40 2.787322 0.006372
50 -2 40 2.690616 0.008373
54 -2 40 2.980735 0.003619
54 -1 40 2.844316 0.005408
54 0 40 2.707897 0.007978
54 0 41 2.691434 0.008354
54 0 39 2.724360 0.007618
53 0 40 2.707897 0.007978
53 0 41 2.691434 0.008354
53 1 41 2.756524 0.006956
53 0 42 2.674971 0.008745
53 1 42 2.941569 0.004067
53 0 43 2.674971 0.008745
54 0 42 2.674971 0.008745
54 1 42 2.941569 0.004067
54 1 41 2.756523 0.006956
54 2 41 2.641063 0.009605
53 2 41 2.641063 0.009605
53 2 42 2.941569 0.004067
53 1 43 2.941569 0.004067
49 -4 40 2.728108 0.007538
49 -4 41 2.681335 0.008592
48 -4 40 2.650071 0.009370
49 -5 41 2.862883 0.005124
49 -4 42 2.634563 0.009778
50 -4 41 2.800509 0.006136
50 -4 42 2.794875 0.006236
48 -5 41 2.711794 0.007891
47 -7 39 2.664543 0.009002
47 -8 39 2.659579 0.009127
47 -8 40 2.799936 0.006146
50 -11 43 3.548715 0.000594
51 -11 43 3.511584 0.000673
52 -11 43 3.474453 0.000761
53 -11 43 3.437323 0.000861
52 -20 42 2.770353 0.006688
DETAILS FOR VOI "Cluster 2"
RandomEffectsAnalysis: No
TypeOfStatistic: t(99)
NrOfVoxels: 864
AbsStatMinValue: 2.626849
AbsStatMaxValue: 4.411327
AvgStatValue: 3.058425
AvgPValue: 0.004327
StatWeightedMass: 2642.479248
PWeightedMass: 3.738397
ListOfVOIVoxels:
x y z StatValue p
------------------------------------------
15 -5 37 2.837065 0.005523
15 -5 36 3.134108 0.002268
14 -5 37 3.669458 0.000394
14 -4 37 3.133663 0.002272
14 -6 37 3.053613 0.002904
14 -5 38 3.404496 0.000958
14 -5 36 3.934418 0.000155
13 -5 37 3.438206 0.000858
13 -4 37 2.971509 0.003720
13 -6 37 2.875914 0.004933
13 -5 38 3.278980 0.001438
13 -5 36 3.597432 0.000504
12 -5 37 3.206956 0.001807
12 -4 37 2.809356 0.005982
12 -6 37 2.698217 0.008197
12 -5 38 3.153465 0.002136
12 -5 36 3.260448 0.001526
11 -5 37 2.975705 0.003674
11 -4 37 2.647202 0.009444
11 -5 38 3.027949 0.003139
11 -5 36 2.923461 0.004290
11 -4 38 2.825069 0.005718
11 -6 38 2.772131 0.006654
11 -5 39 3.080194 0.002678
11 -4 39 3.002936 0.003385
11 -6 39 3.023743 0.003180
11 -5 40 2.990393 0.003515
12 -5 39 3.099974 0.002520
10 -5 39 2.702852 0.008091
10 -6 39 2.669075 0.008890
10 -5 40 2.687752 0.008440
10 -6 40 2.716124 0.007796
10 -5 41 2.672653 0.008802
10 -6 41 2.763173 0.006826
10 -5 42 2.657553 0.009178
11 -5 41 2.900592 0.004589
11 -4 41 2.862631 0.005128
11 -6 41 2.991440 0.003504
11 -5 42 2.810791 0.005958
12 -5 41 2.742118 0.007246
12 -4 41 2.724113 0.007623
12 -6 41 2.764838 0.006794
12 -5 40 2.921046 0.004321
12 -4 40 2.865241 0.005089
12 -6 40 2.836505 0.005532
13 -5 40 2.851700 0.005294
13 -4 40 2.797698 0.006186
13 -6 40 2.665420 0.008980
13 -5 39 3.119755 0.002371
14 -5 40 2.782353 0.006463
14 -4 40 2.730156 0.007494
14 -5 39 3.139535 0.002231
14 -4 39 3.013234 0.003282
14 -6 39 2.677032 0.008695
14 -6 38 2.865323 0.005088
13 -6 39 2.792603 0.006277
13 -6 38 2.834259 0.005568
12 -6 39 2.908173 0.004488
12 -7 39 2.716373 0.007791
12 -6 38 2.803195 0.006089
12 -7 40 2.751965 0.007047
11 -7 39 2.967294 0.003767
11 -8 39 2.910843 0.004453
11 -7 40 3.024790 0.003170
10 -7 39 2.635299 0.009759
10 -7 40 2.744496 0.007197
10 -8 40 2.772867 0.006640
10 -7 41 2.853693 0.005263
10 -8 41 2.944213 0.004035
10 -7 42 2.962890 0.003817
11 -7 41 3.082287 0.002661
11 -8 41 3.173134 0.002009
11 -7 42 3.139783 0.002229
12 -7 41 2.787557 0.006368
12 -8 41 2.810277 0.005966
12 -7 42 2.823150 0.005749
12 -6 42 2.693170 0.008313
12 -8 42 2.953130 0.003929
11 -8 42 3.304280 0.001326
11 -9 42 2.975267 0.003678
11 -8 43 2.687662 0.008442
10 -8 42 3.115559 0.002402
10 -9 42 2.881033 0.004860
10 -8 43 2.666450 0.008955
9 -8 42 2.926839 0.004248
9 -7 42 2.785998 0.006396
9 -9 42 2.786801 0.006382
9 -8 43 2.645238 0.009495
9 -8 41 2.715293 0.007814
8 -8 42 2.738118 0.007328
8 -9 42 2.692568 0.008327
8 -10 42 2.647017 0.009449
7 -9 42 2.636563 0.009725
7 -10 42 2.667740 0.008923
7 -11 42 2.698917 0.008181
6 -10 42 2.688462 0.008423
6 -11 42 2.796368 0.006209
5 -10 42 2.709185 0.007949
5 -11 42 2.893819 0.004681
5 -12 42 2.778240 0.006539
5 -11 43 2.781470 0.006479
4 -11 42 2.657865 0.009170
5 -12 43 2.642370 0.009571
5 -11 44 2.669120 0.008889
6 -11 43 2.692296 0.008334
5 -13 42 2.662662 0.009049
6 -12 42 2.703687 0.008073
7 -12 42 2.629134 0.009925
9 -10 42 2.646763 0.009455
10 -10 42 2.646509 0.009462
11 -10 42 2.646255 0.009469
9 -6 42 2.645157 0.009497
10 -6 42 2.810222 0.005967
11 -6 42 2.975287 0.003678
10 -9 41 2.642892 0.009557
11 -9 41 2.783880 0.006435
12 -8 40 2.667424 0.008930
11 -8 40 3.041989 0.003009
11 -6 40 3.007591 0.003338
14 -3 39 2.886934 0.004777
14 -4 38 3.073448 0.002734
13 -4 39 3.009801 0.003316
13 -3 39 2.899849 0.004599
13 -4 38 2.990655 0.003513
12 -4 39 3.006369 0.003351
12 -3 39 2.912763 0.004428
12 -4 38 2.907862 0.004492
12 -3 38 2.662261 0.009059
13 -3 38 2.702332 0.008103
14 -3 38 2.742403 0.007240
12 -2 39 2.819158 0.005816
12 -3 40 2.809436 0.005981
11 -3 39 2.925678 0.004262
11 -2 39 2.848421 0.005344
11 -3 40 2.875174 0.004944
11 -2 40 2.817565 0.005843
11 -4 40 2.932783 0.004174
11 -3 41 2.824670 0.005724
11 -2 41 2.786709 0.006383
11 -3 42 2.774166 0.006616
12 -3 41 2.706108 0.008018
12 -2 41 2.688103 0.008432
12 -1 41 2.684481 0.008517
12 -2 40 2.753631 0.007013
12 -1 40 2.707700 0.007982
13 -2 40 2.689697 0.008394
13 -3 40 2.743698 0.007213
13 -2 39 2.789896 0.006325
14 -2 39 2.760633 0.006875
14 -3 40 2.677959 0.008673
12 0 40 2.661770 0.009071
12 -1 39 2.730919 0.007478
11 -1 40 2.810480 0.005963
11 0 40 2.803395 0.006085
11 -1 41 2.782588 0.006459
11 -1 39 2.838372 0.005502
11 0 39 2.828323 0.005664
11 1 39 2.818274 0.005831
12 0 39 2.642680 0.009563
11 2 39 2.690289 0.008380
11 1 40 2.796310 0.006210
10 1 39 2.633972 0.009794
10 2 39 2.673373 0.008784
10 1 40 2.661228 0.009085
10 1 41 2.688484 0.008423
10 1 42 2.715739 0.007804
11 1 41 2.774345 0.006612
11 0 41 2.778466 0.006535
11 1 42 2.752381 0.007038
12 1 41 2.677238 0.008690
12 0 41 2.680860 0.008603
12 1 42 2.738636 0.007317
12 0 42 2.699949 0.008157
13 1 42 2.724891 0.007606
13 0 42 2.646360 0.009466
14 1 42 2.711145 0.007906
12 -1 42 2.661262 0.009084
11 0 42 2.753538 0.007015
11 -1 42 2.754696 0.006992
11 -2 42 2.755853 0.006969
9 1 42 2.679097 0.008646
8 1 42 2.642456 0.009568
7 1 42 2.657541 0.009178
7 2 42 2.732410 0.007447
6 1 42 2.672627 0.008802
6 2 42 2.910046 0.004463
5 1 42 2.687712 0.008441
5 2 42 3.087683 0.002617
5 3 42 3.487651 0.000728
5 2 43 2.834144 0.005570
5 2 41 2.856697 0.005217
5 3 41 3.321305 0.001256
6 2 41 2.765474 0.006781
6 3 41 3.097303 0.002541
7 2 41 2.674253 0.008763
7 3 41 2.873302 0.004971
7 4 41 3.072352 0.002743
7 3 42 2.807279 0.006018
7 3 40 2.939325 0.004094
8 3 41 2.649300 0.009390
8 4 41 2.715569 0.007808
8 3 40 2.831507 0.005612
8 4 40 3.051729 0.002921
8 3 39 3.013715 0.003277
9 3 40 2.693237 0.008312
9 4 40 2.776783 0.006567
9 3 39 2.863244 0.005119
9 4 39 3.070031 0.002763
9 2 39 2.656458 0.009206
10 3 39 2.712774 0.007870
10 4 39 2.752175 0.007042
10 5 39 2.838800 0.005495
10 6 39 2.925424 0.004266
10 5 38 2.665756 0.008972
9 5 39 3.096125 0.002550
9 6 39 3.122220 0.002353
9 5 40 2.714334 0.007835
9 5 38 2.827348 0.005680
8 5 39 3.353452 0.001132
8 6 39 3.319016 0.001265
8 4 39 3.387888 0.001012
8 5 40 2.951072 0.003953
8 5 38 2.988940 0.003531
7 5 39 3.521894 0.000650
7 6 39 3.591029 0.000515
7 4 39 3.452760 0.000818
7 5 40 3.249819 0.001578
7 5 38 3.079169 0.002686
6 5 39 3.690336 0.000366
6 6 39 3.863040 0.000200
6 4 39 3.517632 0.000659
6 5 40 3.548565 0.000594
6 5 38 3.169398 0.002033
5 5 39 3.858779 0.000203
5 6 39 4.135053 0.000074
5 4 39 3.582504 0.000530
5 5 40 3.847313 0.000212
5 5 38 3.259627 0.001530
4 5 39 3.736740 0.000312
4 6 39 4.007096 0.000119
4 4 39 3.466383 0.000782
4 5 40 3.719403 0.000331
4 5 38 3.073555 0.002733
3 5 39 3.614702 0.000475
3 6 39 3.879140 0.000189
3 4 39 3.350263 0.001144
3 5 40 3.591495 0.000514
3 5 38 2.887485 0.004769
2 5 39 3.492664 0.000716
2 6 39 3.751184 0.000297
2 4 39 3.234142 0.001659
2 5 40 3.463586 0.000789
2 5 38 2.701413 0.008124
1 5 39 3.231335 0.001673
1 6 39 3.468827 0.000775
1 4 39 2.993841 0.003479
1 5 40 3.285162 0.001410
0 5 39 2.970008 0.003737
0 6 39 3.186473 0.001927
0 4 39 2.753541 0.007015
0 5 40 3.106740 0.002468
-1 5 39 2.708679 0.007960
-1 6 39 2.904116 0.004542
-1 5 40 2.928317 0.004229
-1 6 40 3.158585 0.002102
-1 4 40 2.698046 0.008201
-1 5 41 3.147954 0.002173
-1 6 41 3.413055 0.000932
-1 4 41 2.882852 0.004834
-1 5 42 3.367592 0.001081
0 5 41 3.243472 0.001610
-2 5 41 2.710251 0.007925
-2 6 41 2.920712 0.004325
-2 5 42 2.908250 0.004487
-2 6 42 3.127486 0.002315
-2 4 42 2.689013 0.008410
-1 4 42 3.067658 0.002783
0 4 42 3.038021 0.003045
0 5 42 3.380205 0.001038
0 4 41 2.943195 0.004047
1 4 42 3.008385 0.003330
1 5 42 3.392817 0.000996
1 4 41 3.003537 0.003379
2 4 42 2.978748 0.003640
2 5 42 3.405430 0.000956
2 4 41 3.063879 0.002815
3 4 42 3.281706 0.001426
3 5 42 3.545080 0.000601
3 4 43 2.637881 0.009690
3 4 41 3.304559 0.001325
4 4 42 3.584663 0.000526
4 5 42 3.684729 0.000374
4 3 42 3.022610 0.003191
4 4 43 2.947355 0.003997
4 4 41 3.545237 0.000601
5 4 42 3.887621 0.000183
5 5 42 3.824379 0.000229
5 4 43 3.256830 0.001543
5 4 41 3.785916 0.000263
6 4 42 3.384883 0.001022
6 5 42 3.265022 0.001504
6 3 42 3.147464 0.002176
6 4 43 2.777747 0.006549
6 4 41 3.429133 0.000884
7 4 42 2.882148 0.004844
7 5 42 2.705667 0.008028
7 5 41 2.977743 0.003651
7 6 41 2.883134 0.004830
6 5 41 3.406793 0.000951
6 6 41 3.384453 0.001023
5 5 41 3.835846 0.000220
5 6 41 3.885776 0.000184
4 5 41 3.702066 0.000352
4 6 41 3.858895 0.000203
3 5 41 3.568287 0.000556
3 6 41 3.832015 0.000223
2 5 41 3.434508 0.000869
2 6 41 3.805135 0.000246
1 5 41 3.338990 0.001186
1 6 41 3.674441 0.000387
1 7 41 4.009894 0.000118
1 6 42 3.777248 0.000271
1 6 40 3.571634 0.000550
0 6 41 3.543749 0.000604
0 7 41 3.844026 0.000214
0 6 42 3.722386 0.000328
0 6 40 3.365110 0.001090
0 7 40 3.623482 0.000461
0 8 40 3.380101 0.001038
0 7 39 3.402939 0.000963
1 7 40 3.858107 0.000204
-1 7 40 3.388855 0.001009
-1 8 40 3.211835 0.001780
-1 7 41 3.678157 0.000382
-1 7 39 3.099555 0.002524
-2 7 40 2.915623 0.004391
-2 8 40 2.819499 0.005810
-2 6 40 2.713937 0.007844
-2 7 41 3.131173 0.002289
-2 7 39 2.700074 0.008154
-2 8 39 2.637245 0.009707
-1 8 39 2.995070 0.003466
-1 9 39 2.890584 0.004726
0 8 39 3.268436 0.001488
0 9 39 3.133934 0.002270
0 8 38 2.850439 0.005313
1 8 39 3.541801 0.000608
1 9 39 3.377282 0.001048
1 7 39 3.706321 0.000347
1 8 40 3.548366 0.000594
1 8 38 3.108004 0.002459
2 8 39 3.815168 0.000237
2 9 39 3.620632 0.000465
2 7 39 4.009705 0.000118
2 8 40 3.716633 0.000335
2 8 38 3.365571 0.001088
3 8 39 3.871026 0.000194
3 9 39 3.598475 0.000502
3 7 39 4.143579 0.000072
3 8 40 3.686419 0.000371
3 8 38 3.554085 0.000583
4 8 39 3.926884 0.000159
4 9 39 3.576317 0.000541
4 7 39 4.277453 0.000044
4 8 40 3.656204 0.000412
4 8 38 3.742598 0.000306
5 8 39 3.982742 0.000130
5 9 39 3.554159 0.000583
5 7 39 4.411327 0.000026
5 8 40 3.625990 0.000457
5 8 38 3.931112 0.000157
6 8 39 3.574128 0.000545
6 9 39 3.112514 0.002425
6 7 39 4.035744 0.000107
6 8 40 3.165767 0.002056
6 8 38 3.471664 0.000768
7 8 39 3.165516 0.002058
7 9 39 2.670872 0.008845
7 7 39 3.660163 0.000407
7 8 40 2.705545 0.008031
7 8 38 3.012218 0.003292
8 8 39 2.756902 0.006949
8 7 39 3.284580 0.001413
8 7 40 2.749757 0.007091
8 7 38 2.954437 0.003914
9 7 39 3.148314 0.002171
9 7 38 2.887343 0.004771
10 7 39 3.012049 0.003294
10 7 38 2.820250 0.005798
11 7 39 2.875783 0.004935
11 6 39 2.728627 0.007527
11 7 38 2.753157 0.007023
11 6 38 2.628660 0.009938
11 7 37 2.630530 0.009887
10 7 37 2.628451 0.009944
10 6 38 2.743003 0.007227
9 6 38 2.857345 0.005207
8 6 38 2.971688 0.003718
7 6 38 3.212296 0.001777
7 7 38 3.345425 0.001162
7 6 37 2.833563 0.005579
6 6 38 3.452903 0.000817
6 7 38 3.736411 0.000312
6 6 37 3.042766 0.003002
5 6 38 3.693511 0.000362
5 7 38 4.127398 0.000077
5 6 37 3.251970 0.001567
4 6 38 3.473884 0.000763
4 7 38 3.874214 0.000192
4 6 37 2.940670 0.004077
3 6 38 3.254257 0.001556
3 7 38 3.621032 0.000465
3 6 37 2.629373 0.009919
2 6 38 3.034630 0.003077
2 7 38 3.367847 0.001080
1 6 38 2.804055 0.006074
1 7 38 3.097123 0.002543
0 7 38 2.826400 0.005696
2 7 37 2.725988 0.007583
2 8 37 2.915972 0.004386
3 7 37 3.098483 0.002532
3 8 37 3.237143 0.001643
4 7 37 3.470975 0.000770
4 8 37 3.558312 0.000575
4 7 36 3.067737 0.002782
5 7 37 3.843469 0.000214
5 8 37 3.879482 0.000189
5 7 36 3.559541 0.000573
6 7 37 3.437076 0.000861
6 8 37 3.369200 0.001075
6 7 36 3.137743 0.002243
7 7 37 3.030685 0.003114
7 8 37 2.858921 0.005184
7 7 36 2.715947 0.007800
7 8 36 2.705623 0.008029
7 9 36 2.695299 0.008264
6 8 36 3.266736 0.001496
6 9 36 3.395729 0.000986
5 8 36 3.827852 0.000227
5 9 36 4.096163 0.000086
5 8 35 2.708700 0.007960
4 8 36 3.374026 0.001059
4 9 36 3.680314 0.000379
3 8 36 2.920202 0.004332
3 9 36 3.264467 0.001506
3 10 36 3.608734 0.000485
3 9 37 3.375803 0.001053
2 9 36 2.848618 0.005341
2 10 36 3.230863 0.001676
2 9 37 3.105956 0.002474
2 10 37 3.295940 0.001362
2 9 38 3.363294 0.001096
1 9 37 2.860487 0.005160
1 10 37 3.046770 0.002965
1 8 37 2.674206 0.008764
1 9 38 3.118885 0.002378
1 10 38 3.129766 0.002299
0 9 38 2.874477 0.004954
0 10 38 2.898516 0.004617
-1 9 38 2.630068 0.009900
-1 10 38 2.667265 0.008934
-1 11 38 2.749398 0.007098
-1 10 39 2.786098 0.006394
-1 11 39 2.855494 0.005236
-1 10 40 2.857795 0.005201
0 10 39 2.999431 0.003421
0 11 39 2.952931 0.003932
0 10 40 2.893341 0.004688
1 10 39 3.212763 0.001774
1 11 39 3.050366 0.002933
1 10 40 2.928887 0.004222
2 10 39 3.426095 0.000893
2 11 39 3.147803 0.002174
2 10 40 2.964432 0.003799
2 10 38 3.361018 0.001104
3 10 39 3.325921 0.001237
3 11 39 2.952363 0.003938
3 10 40 2.819935 0.005803
3 10 38 3.420192 0.000910
4 10 39 3.225748 0.001703
4 11 39 2.756924 0.006948
4 10 40 2.675438 0.008734
4 10 38 3.479366 0.000749
5 10 39 3.125573 0.002329
5 10 38 3.538540 0.000614
6 10 39 2.650898 0.009348
6 10 38 2.942172 0.004059
6 9 38 3.206919 0.001807
6 10 37 3.233448 0.001662
6 11 37 2.626849 0.009988
6 9 37 3.301324 0.001339
6 10 36 3.524722 0.000644
5 10 37 3.951508 0.000146
5 11 37 3.285868 0.001407
5 9 37 3.915495 0.000166
5 10 36 4.364474 0.000031
4 10 37 3.732985 0.000316
4 11 37 3.244264 0.001606
4 9 37 3.645648 0.000427
4 10 36 3.986603 0.000128
3 10 37 3.514463 0.000666
3 11 37 3.202661 0.001832
3 12 37 2.890860 0.004722
3 11 38 3.077511 0.002700
3 11 36 3.327809 0.001230
2 11 37 3.161057 0.002086
2 12 37 3.026174 0.003156
2 11 38 3.154429 0.002130
2 11 36 3.167684 0.002044
1 11 37 2.988471 0.003536
1 12 37 2.930173 0.004206
1 11 38 3.019419 0.003221
1 11 36 2.957523 0.003878
0 11 37 2.815886 0.005871
0 12 37 2.834172 0.005569
0 10 37 2.797601 0.006187
0 11 38 2.884409 0.004812
0 11 36 2.747364 0.007139
-1 11 37 2.643301 0.009546
-1 12 37 2.738171 0.007327
-1 13 37 2.833041 0.005588
-1 12 38 2.831531 0.005612
-1 12 36 2.644811 0.009507
-1 13 36 2.752418 0.007037
0 12 36 2.798042 0.006180
0 13 36 2.848721 0.005340
1 12 36 2.951273 0.003951
1 13 36 2.945023 0.004025
2 12 36 3.104505 0.002486
2 13 36 3.041326 0.003015
3 12 36 3.046886 0.002964
3 13 36 2.765962 0.006772
4 12 36 2.989268 0.003527
4 11 36 3.487934 0.000728
4 12 37 2.755546 0.006975
5 12 36 2.931650 0.004188
5 11 36 3.648060 0.000424
5 11 35 2.751714 0.007052
6 11 36 2.873107 0.004974
5 10 35 3.090680 0.002593
5 9 35 2.899689 0.004601
4 10 35 2.836098 0.005538
2 13 37 2.891290 0.004716
2 13 38 2.741254 0.007263
1 13 37 2.871874 0.004992
1 13 38 2.798724 0.006168
0 13 37 2.852457 0.005282
0 14 37 2.662111 0.009063
0 13 38 2.856194 0.005225
0 14 38 2.777144 0.006560
0 12 38 2.870301 0.005015
0 13 39 2.859930 0.005168
-1 13 38 2.913664 0.004416
-1 14 38 2.935924 0.004135
-1 13 39 2.994286 0.003475
-2 13 38 2.632185 0.009843
-2 13 39 2.677718 0.008679
-2 14 39 2.727241 0.007556
-2 13 40 2.765728 0.006777
-2 14 40 2.803824 0.006078
-2 12 40 2.719569 0.007721
-2 13 41 2.853738 0.005262
-1 13 40 2.819136 0.005816
-3 13 40 2.712320 0.007880
-3 14 40 2.637280 0.009706
-3 13 41 3.063490 0.002818
-4 13 40 2.658912 0.009143
-4 13 41 3.273242 0.001465
-4 14 41 3.027219 0.003146
-4 12 41 2.972081 0.003714
-4 13 42 3.887571 0.000183
-5 13 41 3.109526 0.002447
-5 14 41 2.871228 0.005001
-5 12 41 2.784275 0.006428
-5 13 42 3.622203 0.000463
-6 13 41 2.945810 0.004016
-6 14 41 2.715237 0.007815
-6 13 42 3.356836 0.001120
-7 13 41 2.782093 0.006468
-7 13 42 3.091468 0.002587
-7 14 42 2.797074 0.006197
-7 12 42 2.747409 0.007138
-7 13 43 2.687696 0.008441
-6 13 43 2.926854 0.004248
-6 14 43 2.755453 0.006977
-5 13 43 3.166011 0.002054
-5 14 43 2.970758 0.003728
-5 12 43 2.728872 0.007521
-5 13 44 2.709817 0.007935
-4 13 43 3.405169 0.000956
-4 14 43 3.186064 0.001930
-4 12 43 2.939624 0.004090
-4 13 44 2.922765 0.004299
-3 13 43 3.040819 0.003019
-3 14 43 2.933795 0.004161
-3 12 43 2.750281 0.007080
-3 13 44 2.666978 0.008942
-3 13 42 3.414658 0.000927
-2 13 43 2.676471 0.008709
-2 14 43 2.681528 0.008587
-2 13 42 2.941748 0.004064
-2 14 42 2.956989 0.003884
-2 12 42 2.914024 0.004411
-2 11 42 2.886301 0.004786
-2 12 41 2.816797 0.005856
-1 12 42 2.646287 0.009468
-3 12 42 3.181761 0.001956
-3 11 42 2.948864 0.003979
-3 12 41 2.894439 0.004673
-4 12 42 3.449498 0.000827
-4 11 42 3.011428 0.003300
-5 12 42 3.215468 0.001759
-5 11 42 2.808735 0.005993
-6 12 42 2.981439 0.003611
-4 11 41 2.670921 0.008844
-3 11 41 2.725389 0.007596
-2 11 41 2.779856 0.006509
-2 10 41 2.742914 0.007229
-2 11 40 2.673410 0.008783
-1 11 41 2.834323 0.005567
-1 12 41 2.739155 0.007306
-1 10 41 2.929492 0.004215
-1 11 42 2.823737 0.005740
-1 11 40 2.844909 0.005399
-1 12 40 2.832022 0.005604
0 11 40 2.776510 0.006572
0 12 40 2.659680 0.009124
1 11 40 2.708112 0.007973
2 11 40 2.639713 0.009641
0 12 39 2.906431 0.004511
1 12 39 2.887971 0.004762
-1 12 39 2.924890 0.004272
1 13 39 2.725575 0.007592
1 12 38 2.909072 0.004476
2 12 39 2.869512 0.005026
2 12 38 2.947843 0.003992
3 12 38 2.734833 0.007396
1 14 39 2.650620 0.009355
0 14 39 2.892178 0.004704
0 15 39 2.924425 0.004278
0 14 40 2.645055 0.009500
-1 14 39 3.133737 0.002271
-1 15 39 3.273186 0.001465
-1 14 40 2.970368 0.003733
-1 15 40 3.121600 0.002358
-1 14 41 2.807000 0.006023
-1 15 41 2.970014 0.003737
-1 13 41 2.643986 0.009528
-1 14 42 2.643632 0.009537
-2 14 41 2.880407 0.004869
-2 15 41 2.907075 0.004503
-3 14 41 2.953813 0.003921
-3 15 41 2.844136 0.005411
-3 14 42 3.270345 0.001478
-3 15 42 3.126032 0.002326
-4 14 42 3.583702 0.000528
-4 15 42 3.279834 0.001434
-5 14 42 3.321492 0.001255
-5 15 42 3.020783 0.003208
-6 14 42 3.059284 0.002855
-6 15 42 2.761733 0.006854
-5 16 42 2.720072 0.007710
-5 15 43 2.775506 0.006591
-5 15 41 2.632931 0.009822
-4 15 41 2.781198 0.006485
-4 15 43 2.966961 0.003771
-4 16 43 2.747856 0.007129
-4 15 44 2.654086 0.009266
-3 15 43 2.826772 0.005690
-3 16 43 2.719749 0.007717
-2 15 43 2.686584 0.008467
-2 16 43 2.691642 0.008349
-2 15 42 2.972230 0.003712
-2 16 42 2.987471 0.003546
-1 15 42 2.818427 0.005828
-1 16 42 2.993224 0.003486
-1 16 43 2.663534 0.009027
-1 16 41 3.133028 0.002276
0 16 42 2.635054 0.009765
0 16 41 2.742260 0.007243
0 16 40 2.849466 0.005328
0 15 40 2.747260 0.007141
0 16 39 2.956672 0.003888
-1 16 40 3.272832 0.001467
-1 17 40 2.874019 0.004961
-1 16 39 3.412637 0.000933
-2 16 40 2.880015 0.004874
-2 15 40 2.841919 0.005446
-2 16 41 2.933743 0.004162
-2 16 39 2.826287 0.005698
-2 15 39 2.776764 0.006567
-3 16 41 2.734459 0.007404
-3 16 42 2.981718 0.003608
-4 16 42 2.975965 0.003671
-1 17 39 3.027807 0.003141
-1 16 38 2.980445 0.003622
-1 17 38 2.778163 0.006541
-1 15 38 2.958184 0.003871
-1 15 37 2.643182 0.009549
0 15 38 2.698096 0.008200
-1 14 37 2.738111 0.007328
-1 18 39 2.642981 0.009555
0 17 39 2.662636 0.009050
-1 17 41 2.720230 0.007707
-4 14 44 2.788425 0.006352
-1 10 42 3.001189 0.003403
-1 9 42 3.323279 0.001248
0 10 42 2.681160 0.008596
-2 10 42 2.858577 0.005189
-2 9 42 3.021293 0.003203
-3 10 42 2.715966 0.007799
-3 9 42 2.719308 0.007727
-3 8 42 2.722650 0.007654
-3 7 42 2.725992 0.007583
-2 8 42 3.184007 0.001942
-2 7 42 3.346723 0.001157
-2 8 41 3.001754 0.003398
-1 8 42 3.645367 0.000428
-1 7 42 3.967457 0.000138
-1 8 43 2.908018 0.004490
-1 8 41 3.428601 0.000886
0 8 42 3.603432 0.000493
0 9 42 3.142298 0.002212
0 7 42 4.064569 0.000097
0 8 43 2.786232 0.006392
0 8 41 3.491767 0.000719
1 8 42 3.561497 0.000569
1 9 42 2.961317 0.003835
1 7 42 4.161680 0.000067
1 8 43 2.664446 0.009004
1 8 41 3.554932 0.000581
2 8 42 3.519562 0.000655
2 9 42 2.780336 0.006500
2 7 42 4.258792 0.000047
2 8 41 3.618097 0.000469
3 8 42 3.317203 0.001272
3 7 42 4.071826 0.000094
3 8 41 3.501811 0.000695
4 8 42 3.114845 0.002408
4 7 42 3.884861 0.000185
4 8 41 3.385525 0.001020
5 8 42 2.912486 0.004432
5 7 42 3.697896 0.000357
5 8 41 3.269238 0.001484
5 7 41 3.935706 0.000154
6 8 41 2.757404 0.006939
6 7 41 3.362114 0.001101
6 7 42 3.025299 0.003165
6 7 40 3.698929 0.000356
7 7 41 2.788525 0.006350
7 7 40 3.224345 0.001711
7 6 40 3.237082 0.001643
8 6 40 2.850415 0.005313
6 6 40 3.623747 0.000460
5 6 40 4.010414 0.000118
5 7 40 4.173517 0.000065
4 6 40 3.932996 0.000156
4 7 40 4.146589 0.000071
3 6 40 3.855577 0.000205
3 7 40 4.119661 0.000079
2 6 40 3.778159 0.000270
2 7 40 4.092734 0.000087
2 7 41 4.175763 0.000064
3 7 41 4.095744 0.000086
4 7 41 4.015725 0.000115
9 6 40 2.651886 0.009323
6 6 42 3.145161 0.002192
5 6 42 3.761137 0.000287
5 6 43 2.753745 0.007011
4 6 42 3.784795 0.000264
4 6 43 2.783345 0.006445
3 6 42 3.808452 0.000243
3 6 43 2.812946 0.005921
2 6 42 3.832110 0.000223
2 6 43 2.842546 0.005436
2 7 43 3.099617 0.002523
1 6 43 2.851471 0.005297
1 7 43 3.105330 0.002479
0 6 43 2.860395 0.005161
0 7 43 3.111043 0.002436
-1 6 43 2.869320 0.005029
-1 7 43 3.116756 0.002393
-1 6 42 3.667524 0.000396
-2 7 43 2.635020 0.009766
3 7 43 2.900478 0.004591
4 7 43 2.701340 0.008126
3 5 43 2.725414 0.007595
4 5 43 2.865350 0.005088
5 5 43 3.005287 0.003362
4 9 41 2.755327 0.006980
4 9 40 3.165823 0.002056
3 9 41 2.907881 0.004492
3 9 40 3.253178 0.001561
2 9 41 3.060434 0.002845
2 9 40 3.340534 0.001180
1 9 41 3.099972 0.002520
1 10 41 2.645010 0.009501
1 9 40 3.238627 0.001635
0 9 41 3.139510 0.002231
0 10 41 2.787251 0.006373
0 9 40 3.136722 0.002250
-1 9 41 3.179048 0.001972
-1 9 40 3.034816 0.003075
-2 9 41 2.872334 0.004985
-2 9 40 2.723375 0.007639
-2 10 40 2.627251 0.009977
5 9 40 3.078467 0.002692
6 9 40 2.632607 0.009831
-1 9 43 2.699282 0.008173
0 10 36 2.696686 0.008232
1 10 36 2.963773 0.003807
4 11 38 3.000593 0.003409
5 11 38 2.923675 0.004288
4 9 38 3.610982 0.000481
5 9 38 3.734827 0.000314
3 9 38 3.487139 0.000730
7 10 36 2.684975 0.008505
7 9 37 2.687157 0.008454
7 9 38 2.679014 0.008648
6 6 36 2.632629 0.009831
5 6 36 2.810429 0.005964
5 5 37 2.660473 0.009104
6 5 37 2.648458 0.009411
7 5 37 2.636443 0.009728
6 4 40 3.473382 0.000764
6 3 40 3.047141 0.002962
7 4 40 3.262557 0.001516
5 4 40 3.684210 0.000374
5 3 40 3.154958 0.002126
4 4 40 3.505810 0.000686
4 3 40 2.984861 0.003574
3 4 40 3.327411 0.001231
3 3 40 2.814764 0.005890
2 4 40 3.149011 0.002166
2 3 40 2.644667 0.009510
1 4 40 2.998689 0.003429
0 4 40 2.848368 0.005345
2 3 39 2.920735 0.004325
3 3 39 2.943361 0.004045
1 3 39 2.773264 0.006633
4 3 39 2.965986 0.003782
5 3 39 2.988612 0.003534
6 3 39 2.996980 0.003447
7 3 39 3.005347 0.003361
3 3 41 2.686168 0.008477
4 3 41 3.003736 0.003377
6 3 43 2.713829 0.007846
6 2 43 2.649911 0.009374
5 3 43 3.045486 0.002977
4 4 38 2.673225 0.008788
5 4 38 2.825740 0.005707
6 4 38 2.885891 0.004791
7 4 38 2.946041 0.004013
8 4 38 3.006192 0.003352
9 4 38 2.797350 0.006192
8 2 39 2.639544 0.009645
11 -4 42 2.792478 0.006279
12 -4 36 2.710850 0.007912
13 -4 36 2.952363 0.003938
14 -4 36 3.193877 0.001883
13 -6 36 2.917570 0.004366
14 -6 36 3.241903 0.001618
15 -6 36 2.645809 0.009480
14 -5 35 3.023108 0.003186
DETAILS FOR VOI "Cluster 3"
RandomEffectsAnalysis: No
TypeOfStatistic: t(99)
NrOfVoxels: 359
AbsStatMinValue: 2.626622
AbsStatMaxValue: 3.840110
AvgStatValue: 2.882907
AvgPValue: 0.005565
StatWeightedMass: 1034.963501
PWeightedMass: 1.997699
ListOfVOIVoxels:
x y z StatValue p
------------------------------------------
13 46 42 2.809719 0.005976
12 46 42 3.148484 0.002170
12 47 42 2.874504 0.004954
12 45 42 2.848905 0.005337
12 46 41 2.884073 0.004817
11 46 42 3.487250 0.000729
11 47 42 3.188542 0.001915
11 45 42 3.087917 0.002615
11 46 41 3.183321 0.001946
10 46 42 3.604870 0.000491
10 47 42 3.364704 0.001091
10 45 42 3.170506 0.002026
10 46 41 3.272702 0.001467
9 46 42 3.722489 0.000328
9 47 42 3.540864 0.000610
9 45 42 3.253095 0.001562
9 46 43 2.745165 0.007183
9 46 41 3.362083 0.001101
8 46 42 3.840110 0.000217
8 47 42 3.717025 0.000334
8 45 42 3.335684 0.001199
8 46 43 2.993849 0.003479
8 46 41 3.451464 0.000821
7 46 42 3.442894 0.000845
7 47 42 3.400685 0.000971
7 45 42 3.046648 0.002966
7 46 43 2.784957 0.006415
7 46 41 3.191676 0.001896
6 46 42 3.045682 0.002975
6 47 42 3.084346 0.002644
6 45 42 2.757614 0.006935
6 46 41 2.931890 0.004185
5 46 42 2.648467 0.009411
5 47 42 2.768006 0.006733
5 46 41 2.672102 0.008815
4 46 42 2.791794 0.006291
4 47 42 2.882452 0.004840
4 46 41 2.814760 0.005890
3 46 42 2.935120 0.004145
3 47 42 2.996897 0.003448
3 45 42 2.776483 0.006572
3 46 41 2.957417 0.003879
2 46 42 3.078447 0.002692
2 47 42 3.111342 0.002434
2 45 42 2.930435 0.004203
2 46 43 2.685311 0.008497
2 46 41 3.100074 0.002520
1 46 42 3.139911 0.002228
1 47 42 3.076367 0.002710
1 45 42 3.001023 0.003405
1 46 43 2.634903 0.009769
1 46 41 3.093368 0.002572
0 46 42 3.201375 0.001839
0 47 42 3.041391 0.003014
0 45 42 3.071611 0.002749
0 46 41 3.086662 0.002626
-1 46 42 3.262838 0.001514
-1 47 42 3.006416 0.003350
-1 45 42 3.142199 0.002212
-1 46 41 3.079956 0.002680
-2 46 42 3.228054 0.001691
-2 47 42 2.961598 0.003831
-2 45 42 3.074609 0.002724
-2 46 41 2.988082 0.003540
-3 46 42 3.193269 0.001887
-3 47 42 2.916781 0.004376
-3 45 42 3.007019 0.003344
-3 46 41 2.896209 0.004649
-4 46 42 3.158484 0.002103
-4 47 42 2.871964 0.004990
-4 45 42 2.939429 0.004092
-4 46 41 2.804335 0.006069
-5 46 42 2.782637 0.006458
-5 45 42 2.652728 0.009301
-4 47 41 2.646019 0.009475
-3 47 41 2.716392 0.007790
-2 47 41 2.786765 0.006382
-1 47 41 2.857137 0.005211
-1 48 41 2.634318 0.009785
-1 47 40 2.707858 0.007979
0 47 41 2.898590 0.004616
0 48 41 2.710517 0.007920
0 47 40 2.755788 0.006971
1 47 41 2.940042 0.004085
1 48 41 2.786716 0.006383
1 47 40 2.803717 0.006080
2 47 41 2.981495 0.003610
2 48 41 2.862915 0.005124
2 47 40 2.851647 0.005294
3 47 41 2.870922 0.005006
3 48 41 2.784427 0.006425
3 47 40 2.744946 0.007188
4 47 41 2.760349 0.006881
4 48 41 2.705939 0.008022
4 47 40 2.638247 0.009680
5 47 41 2.649776 0.009377
5 48 41 2.627450 0.009971
6 47 41 2.882281 0.004842
6 48 41 2.832672 0.005594
6 47 40 2.680215 0.008619
7 47 41 3.114784 0.002408
7 48 41 3.037892 0.003046
7 47 40 2.828883 0.005655
8 47 41 3.347289 0.001155
8 48 41 3.243114 0.001612
8 47 40 2.977551 0.003653
9 47 41 3.198570 0.001855
9 48 41 3.035057 0.003073
9 47 40 2.856276 0.005224
10 47 41 3.049853 0.002938
10 48 41 2.827002 0.005686
10 47 40 2.735001 0.007393
11 47 41 2.901134 0.004582
10 46 40 2.940533 0.004079
11 46 40 2.879390 0.004883
9 46 40 3.001675 0.003398
9 46 39 2.641268 0.009600
8 46 40 3.062818 0.002824
8 46 39 2.674172 0.008765
7 46 40 2.940458 0.004080
7 46 39 2.689240 0.008405
6 46 40 2.818098 0.005834
6 46 39 2.704307 0.008058
5 46 40 2.695738 0.008254
5 46 39 2.719374 0.007725
4 46 40 2.837726 0.005512
4 45 40 2.665024 0.008990
4 46 39 2.860692 0.005157
3 46 40 2.979713 0.003630
3 45 40 2.798936 0.006164
3 46 39 3.002010 0.003395
2 46 40 3.121701 0.002357
2 45 40 2.932850 0.004173
2 46 39 3.143328 0.002205
1 46 40 3.046825 0.002965
1 45 40 2.861029 0.005152
1 46 39 3.000282 0.003413
0 46 40 2.971949 0.003715
0 45 40 2.789208 0.006338
0 46 39 2.857236 0.005209
-1 46 40 2.897072 0.004637
-1 45 40 2.717388 0.007768
-1 46 39 2.714189 0.007838
-2 46 40 2.748110 0.007124
-1 45 41 2.929793 0.004211
-1 44 41 2.779631 0.006514
0 45 41 2.930410 0.004203
-2 45 41 2.821239 0.005781
-2 44 41 2.654395 0.009258
-3 45 41 2.712685 0.007872
-2 44 42 2.921163 0.004320
-2 43 42 2.767718 0.006738
-1 44 42 3.021559 0.003201
-3 44 42 2.820768 0.005789
-3 43 42 2.634518 0.009780
-4 44 42 2.720373 0.007703
-1 43 42 2.900919 0.004585
-1 44 43 2.679711 0.008631
0 44 42 2.941847 0.004063
0 43 42 2.812083 0.005936
0 44 41 2.774158 0.006616
1 44 42 2.862135 0.005135
1 43 42 2.723248 0.007641
1 44 41 2.768684 0.006720
2 44 42 2.782423 0.006462
2 43 42 2.634411 0.009783
2 44 41 2.763210 0.006825
2 45 41 2.931643 0.004188
2 44 40 2.743998 0.007207
2 44 39 2.724785 0.007608
1 44 40 2.675232 0.008739
2 45 39 2.934057 0.004158
3 45 39 2.810163 0.005968
1 45 39 2.791032 0.006305
0 45 39 2.648008 0.009423
4 45 39 2.686270 0.008475
3 45 41 2.787710 0.006365
1 45 41 2.931026 0.004196
4 45 41 2.643777 0.009534
2 42 42 2.804150 0.006072
2 41 42 2.973889 0.003694
3 42 42 2.634392 0.009783
1 42 42 2.825170 0.005716
1 41 42 2.927093 0.004245
0 42 42 2.846190 0.005379
0 41 42 2.880298 0.004870
0 42 43 2.685953 0.008482
-1 42 42 2.867211 0.005060
-1 41 42 2.833503 0.005580
-1 42 43 2.766814 0.006756
-2 42 42 2.694596 0.008280
-1 43 43 2.752522 0.007035
-1 41 43 2.781106 0.006486
-1 42 44 2.666418 0.008955
-1 41 44 2.728710 0.007525
-1 40 44 2.791003 0.006305
-1 41 45 2.676314 0.008713
-1 40 45 2.786607 0.006385
-2 40 45 2.826092 0.005701
-2 40 44 2.733512 0.007424
-3 40 45 2.865577 0.005084
-3 39 45 2.678473 0.008661
-3 40 44 2.676021 0.008720
-4 40 45 2.905062 0.004529
-4 39 45 2.753828 0.007009
-5 40 45 2.776033 0.006581
-6 40 45 2.647006 0.009449
-2 40 43 2.640931 0.009609
-1 40 43 2.795399 0.006227
-1 40 42 2.799794 0.006149
0 40 43 2.768740 0.006719
0 41 43 2.727347 0.007554
0 40 42 2.914405 0.004407
1 40 43 2.742083 0.007246
1 41 43 2.673587 0.008779
1 40 42 3.029016 0.003129
2 40 43 2.715424 0.007811
2 40 42 3.143627 0.002203
3 40 43 2.636622 0.009723
3 40 42 2.984761 0.003575
3 41 42 2.809577 0.005978
3 39 42 2.755836 0.006970
4 40 42 2.825895 0.005704
4 41 42 2.645265 0.009495
4 39 42 2.687058 0.008456
5 40 42 2.667028 0.008940
6 40 42 2.663800 0.009021
6 39 42 2.695765 0.008253
7 40 42 2.660571 0.009102
7 39 42 2.773250 0.006633
7 40 43 2.747374 0.007139
8 40 42 2.657343 0.009183
8 39 42 2.850735 0.005308
8 40 43 2.881553 0.004853
8 41 43 2.626622 0.009994
8 39 43 2.851886 0.005291
8 40 44 3.105765 0.002476
8 41 44 2.706072 0.008019
8 39 44 2.853037 0.005273
8 40 45 3.329975 0.001221
7 40 44 2.834177 0.005569
7 40 45 2.920981 0.004322
8 41 45 2.785521 0.006405
8 39 45 2.854189 0.005255
8 40 46 2.736894 0.007353
8 38 43 2.822219 0.005765
7 39 43 2.681306 0.008593
8 37 43 2.792551 0.006278
8 38 42 3.044127 0.002989
9 38 43 2.639329 0.009651
9 37 43 2.708595 0.007962
9 38 42 2.961216 0.003836
9 39 42 2.756407 0.006958
9 37 42 3.166025 0.002054
10 38 42 2.878305 0.004899
10 39 42 2.662079 0.009064
10 37 42 3.094531 0.002563
11 38 42 2.795394 0.006227
11 37 42 3.023036 0.003186
12 37 42 2.815346 0.005880
10 36 42 2.642597 0.009565
9 36 42 2.736598 0.007359
8 36 42 2.830599 0.005627
8 37 42 3.237519 0.001641
7 37 42 2.998607 0.003430
7 38 42 2.885928 0.004791
6 37 42 2.759696 0.006894
6 38 42 2.727731 0.007546
2 39 42 2.824613 0.005725
1 39 42 2.728534 0.007529
0 39 42 2.632456 0.009835
0 43 43 2.644559 0.009513
-1 43 41 2.629469 0.009916
1 47 39 2.667392 0.008931
2 47 39 2.721799 0.007673
10 48 42 3.124536 0.002337
10 49 42 2.884369 0.004813
11 48 42 2.889833 0.004736
9 48 42 3.359238 0.001111
9 49 42 3.177612 0.001981
9 48 43 2.767259 0.006747
8 48 42 3.593941 0.000510
8 49 42 3.470856 0.000770
8 48 43 2.998185 0.003434
7 48 42 3.358475 0.001114
7 49 42 3.316266 0.001276
7 48 43 2.822905 0.005753
6 48 42 3.123011 0.002348
6 49 42 3.161676 0.002082
6 48 43 2.647625 0.009433
5 48 42 2.887546 0.004768
5 49 42 3.007085 0.003343
4 48 42 2.973110 0.003702
4 49 42 3.063768 0.002816
3 48 42 3.058674 0.002860
3 49 42 3.120451 0.002366
3 48 43 2.639162 0.009656
2 48 42 3.144238 0.002198
2 49 42 3.177134 0.001984
2 48 43 2.722571 0.007656
1 48 42 3.012823 0.003286
1 49 42 2.949279 0.003974
0 48 42 2.881408 0.004855
0 49 42 2.721425 0.007681
-1 48 42 2.749992 0.007086
-2 48 42 2.695143 0.008268
-3 48 42 2.640293 0.009626
1 50 42 2.636395 0.009729
1 49 41 2.633390 0.009810
2 49 41 2.744336 0.007200
3 49 41 2.697932 0.008203
4 49 41 2.651528 0.009332
2 50 42 2.834634 0.005562
3 50 42 2.767016 0.006752
4 50 42 2.699398 0.008170
5 50 42 2.631780 0.009854
6 50 42 2.827641 0.005675
7 50 42 3.023500 0.003182
7 51 42 2.730735 0.007482
7 50 43 2.649723 0.009379
8 50 42 3.219361 0.001738
8 51 42 2.967865 0.003761
8 50 43 2.890747 0.004724
8 50 41 2.852153 0.005287
9 50 42 2.843193 0.005426
8 49 41 3.138938 0.002235
8 49 40 2.807019 0.006023
9 49 41 2.871545 0.004997
7 49 41 2.961000 0.003838
6 49 41 2.783062 0.006450
8 48 40 2.892285 0.004703
9 48 40 2.710876 0.007912
7 48 40 2.717308 0.007770
8 51 43 2.781142 0.006486
8 49 43 3.000353 0.003412
9 49 43 2.778306 0.006538
7 49 43 2.841878 0.005447
6 49 43 2.683404 0.008543
8 52 43 2.671536 0.008829
8 52 44 2.626703 0.009992
8 52 42 2.716369 0.007791
2 49 43 2.741201 0.007264
2 47 43 2.703941 0.008067
3 49 43 2.669110 0.008889
7 47 43 2.803931 0.006076
8 47 43 2.996017 0.003457
9 47 43 2.756212 0.006962
6 45 41 2.655643 0.009226
7 45 41 2.811441 0.005946
8 45 41 2.967240 0.003768
9 45 41 2.912223 0.004435
10 45 41 2.857207 0.005210
11 45 41 2.802191 0.006107
7 44 42 2.650401 0.009361
8 44 42 2.831257 0.005616
9 44 42 2.783699 0.006438
10 44 42 2.736141 0.007369
11 44 42 2.688583 0.008420
8 45 43 2.701485 0.008122
DETAILS FOR VOI "Cluster 4"
RandomEffectsAnalysis: No
TypeOfStatistic: t(99)
NrOfVoxels: 445
AbsStatMinValue: 2.626933
AbsStatMaxValue: 3.789203
AvgStatValue: 2.910584
AvgPValue: 0.005285
StatWeightedMass: 1295.209717
PWeightedMass: 2.351694
ListOfVOIVoxels:
x y z StatValue p
------------------------------------------
-13 -86 21 2.905322 0.004526
-14 -86 21 2.929511 0.004214
-14 -86 20 2.667982 0.008917
-15 -86 21 2.953699 0.003923
-15 -87 21 2.650213 0.009366
-15 -86 20 2.787826 0.006363
-16 -86 21 2.977888 0.003650
-16 -87 21 2.712133 0.007884
-16 -86 20 2.907671 0.004495
-17 -86 21 3.115937 0.002400
-17 -87 21 2.764279 0.006805
-17 -86 20 3.113256 0.002419
-18 -86 21 3.253985 0.001557
-18 -85 21 2.626933 0.009986
-18 -87 21 2.816425 0.005862
-18 -86 22 2.718387 0.007747
-18 -86 20 3.318839 0.001266
-19 -86 21 3.392034 0.000998
-19 -85 21 2.741024 0.007268
-19 -87 21 2.868571 0.005040
-19 -86 22 2.815742 0.005873
-19 -86 20 3.524424 0.000644
-20 -86 21 3.065793 0.002799
-20 -87 21 2.672561 0.008804
-20 -86 20 3.200443 0.001844
-21 -86 21 2.739554 0.007298
-21 -86 20 2.876463 0.004925
-21 -87 20 2.706105 0.008018
-21 -86 19 3.013372 0.003281
-21 -85 19 2.699916 0.008158
-21 -87 19 2.935656 0.004138
-21 -86 18 3.150281 0.002157
-20 -86 19 3.335092 0.001201
-22 -86 19 2.691650 0.008349
-22 -87 19 2.686653 0.008466
-22 -86 18 2.830819 0.005624
-23 -86 19 2.959403 0.003857
-23 -85 19 2.678758 0.008654
-23 -87 19 2.822525 0.005760
-23 -86 20 2.798493 0.006172
-23 -86 18 3.120314 0.002367
-24 -86 19 3.227154 0.001696
-24 -85 19 2.828276 0.005665
-24 -87 19 2.958397 0.003868
-24 -86 20 3.044503 0.002986
-24 -86 18 3.409807 0.000942
-25 -86 19 3.494907 0.000711
-25 -85 19 2.977795 0.003651
-25 -87 19 3.094269 0.002565
-25 -86 20 3.290514 0.001386
-25 -86 18 3.699301 0.000355
-26 -86 19 3.294567 0.001368
-26 -85 19 2.775541 0.006590
-26 -87 19 2.935915 0.004135
-26 -86 20 3.066921 0.002789
-26 -86 18 3.522214 0.000649
-27 -86 19 3.094224 0.002565
-27 -87 19 2.777558 0.006552
-27 -86 20 2.843324 0.005424
-27 -86 18 3.345125 0.001163
-28 -86 19 2.893884 0.004681
-28 -86 18 3.168038 0.002041
-28 -87 18 2.865516 0.005085
-28 -86 17 3.044710 0.002984
-29 -86 18 2.911723 0.004441
-29 -87 18 2.748910 0.007108
-29 -86 17 2.755853 0.006969
-30 -86 18 2.655406 0.009233
-28 -85 17 2.636146 0.009736
-28 -87 17 2.808692 0.005994
-28 -86 16 2.921383 0.004317
-27 -86 17 3.209648 0.001792
-27 -85 17 2.802815 0.006096
-27 -87 17 2.946890 0.004003
-27 -86 16 3.074171 0.002728
-26 -86 17 3.374587 0.001057
-26 -85 17 2.969487 0.003742
-26 -87 17 3.085090 0.002638
-26 -86 16 3.226962 0.001697
-25 -86 17 3.539525 0.000612
-25 -85 17 3.136157 0.002254
-25 -87 17 3.223288 0.001716
-25 -86 16 3.379750 0.001039
-24 -86 17 3.221869 0.001724
-24 -85 17 2.907667 0.004495
-24 -87 17 3.022324 0.003193
-24 -86 16 3.033931 0.003083
-23 -86 17 2.904213 0.004541
-23 -85 17 2.679178 0.008644
-23 -87 17 2.821361 0.005779
-23 -86 16 2.688115 0.008431
-23 -87 16 2.635069 0.009765
-24 -87 16 2.919050 0.004347
-24 -88 16 2.804168 0.006072
-24 -87 15 2.815777 0.005873
-25 -87 16 3.203034 0.001830
-25 -88 16 3.026316 0.003155
-25 -87 15 3.182780 0.001950
-26 -87 16 3.052646 0.002913
-26 -88 16 2.878328 0.004899
-26 -87 15 3.020202 0.003214
-27 -87 16 2.902256 0.004567
-27 -88 16 2.730339 0.007490
-27 -87 15 2.857621 0.005203
-28 -87 16 2.751867 0.007048
-28 -87 15 2.695043 0.008270
-28 -86 15 2.798054 0.006179
-28 -85 15 2.747386 0.007138
-28 -86 14 2.673888 0.008772
-27 -86 15 2.938694 0.004101
-27 -85 15 2.861417 0.005146
-27 -86 14 2.762611 0.006837
-26 -86 15 3.079335 0.002685
-26 -85 15 2.975450 0.003676
-26 -86 14 2.851336 0.005299
-25 -86 15 3.219974 0.001735
-25 -85 15 3.089482 0.002603
-25 -86 14 2.940059 0.004085
-24 -86 15 2.845993 0.005382
-24 -85 15 2.707260 0.007992
-24 -86 14 2.693730 0.008300
-24 -87 14 2.676805 0.008701
-24 -88 14 2.659880 0.009119
-25 -87 14 2.969764 0.003739
-25 -88 14 2.999470 0.003421
-25 -87 13 2.756750 0.006952
-26 -87 14 2.830703 0.005625
-26 -88 14 2.810070 0.005970
-26 -87 13 2.641205 0.009601
-27 -87 14 2.691640 0.008349
-26 -88 13 2.659073 0.009139
-26 -89 13 2.676940 0.008698
-25 -88 13 2.853355 0.005268
-25 -89 13 2.949958 0.003966
-25 -88 12 2.707238 0.007993
-25 -89 12 2.870741 0.005008
-25 -89 11 2.701362 0.008125
-25 -89 14 3.029175 0.003128
-25 -89 15 3.108392 0.002456
-24 -89 14 2.642954 0.009555
-26 -89 14 2.789437 0.006334
-26 -89 15 2.901935 0.004571
-26 -88 15 2.961068 0.003838
-26 -89 16 2.704012 0.008065
-27 -89 15 2.695476 0.008260
-27 -88 15 2.776548 0.006571
-25 -89 16 2.849600 0.005326
-24 -89 16 2.689287 0.008404
-24 -89 15 2.755343 0.006979
-24 -88 15 2.785560 0.006404
-25 -88 15 3.145586 0.002189
-25 -86 13 2.660146 0.009112
-24 -85 16 2.807463 0.006015
-25 -85 16 3.112820 0.002423
-25 -84 16 2.845886 0.005384
-26 -85 16 2.972469 0.003709
-26 -84 16 2.717973 0.007756
-27 -85 16 2.832116 0.005603
-28 -85 16 2.691765 0.008346
-26 -84 15 2.871565 0.004996
-26 -83 15 2.767681 0.006739
-26 -84 14 2.686602 0.008467
-25 -84 15 2.958989 0.003861
-27 -84 15 2.784140 0.006430
-27 -83 15 2.706863 0.008001
-28 -84 15 2.696716 0.008231
-28 -83 15 2.646046 0.009474
-28 -82 15 2.740309 0.007283
-28 -81 15 2.834572 0.005563
-27 -82 15 2.721022 0.007689
-27 -81 15 2.735182 0.007389
-26 -82 15 2.701736 0.008117
-26 -81 15 2.635791 0.009746
-25 -82 15 2.682450 0.008565
-25 -83 15 2.828497 0.005661
-25 -83 14 2.654481 0.009256
-25 -84 14 2.749673 0.007092
-25 -85 14 2.844867 0.005400
-26 -85 14 2.768969 0.006714
-27 -85 14 2.693071 0.008316
-27 -80 15 2.749341 0.007099
-28 -80 15 2.928834 0.004223
-28 -80 14 2.647493 0.009436
-25 -84 17 2.732785 0.007439
-27 -88 17 2.684129 0.008525
-27 -88 18 2.637919 0.009689
-26 -88 17 2.795589 0.006223
-26 -88 18 2.712849 0.007868
-25 -88 17 2.907048 0.004503
-25 -88 18 2.787778 0.006364
-24 -88 17 2.822776 0.005756
-24 -88 18 2.841385 0.005454
-23 -88 17 2.738506 0.007320
-23 -89 17 2.655653 0.009226
-23 -88 18 2.894992 0.004665
-22 -88 17 2.654235 0.009262
-22 -89 17 2.688074 0.008432
-22 -88 18 2.948599 0.003983
-21 -88 17 2.869882 0.005021
-21 -87 17 2.890496 0.004727
-21 -89 17 2.849268 0.005331
-21 -88 18 3.180136 0.001966
-20 -88 17 3.085527 0.002635
-20 -87 17 3.160595 0.002089
-20 -89 17 3.010461 0.003310
-20 -88 18 3.411672 0.000936
-20 -88 16 2.759385 0.006900
-19 -88 17 3.301174 0.001340
-19 -87 17 3.430695 0.000879
-19 -89 17 3.171655 0.002019
-19 -88 18 3.643209 0.000431
-19 -88 16 2.959141 0.003860
-18 -88 17 3.176618 0.001987
-18 -87 17 3.218761 0.001741
-18 -89 17 3.134475 0.002266
-18 -88 18 3.452648 0.000818
-18 -88 16 2.900589 0.004589
-17 -88 17 3.052063 0.002918
-17 -87 17 3.006829 0.003346
-17 -89 17 3.097296 0.002541
-17 -88 18 3.262088 0.001518
-17 -88 16 2.842039 0.005444
-16 -88 17 2.927507 0.004239
-16 -87 17 2.794896 0.006236
-16 -89 17 3.060116 0.002847
-16 -88 18 3.071527 0.002750
-16 -88 16 2.783488 0.006442
-16 -87 16 2.670411 0.008857
-16 -89 16 2.896563 0.004644
-16 -88 15 2.639467 0.009647
-16 -89 15 2.733009 0.007434
-17 -88 15 2.632014 0.009847
-17 -87 15 2.650508 0.009358
-17 -86 15 2.669002 0.008891
-17 -87 16 2.828669 0.005659
-17 -87 14 2.667567 0.008927
-18 -87 15 2.755090 0.006984
-18 -86 15 2.885618 0.004795
-18 -87 16 2.986926 0.003552
-18 -87 14 2.786512 0.006387
-19 -87 15 2.859672 0.005172
-19 -86 15 3.102236 0.002503
-19 -87 16 3.145184 0.002192
-19 -87 14 2.905457 0.004524
-19 -86 14 3.152629 0.002142
-19 -88 14 2.658283 0.009159
-19 -87 13 2.951241 0.003951
-20 -87 14 2.633934 0.009795
-20 -86 14 2.835443 0.005549
-20 -87 13 2.667495 0.008929
-20 -86 13 2.903385 0.004552
-20 -87 12 2.701057 0.008132
-20 -86 12 2.971326 0.003722
-19 -87 12 2.997026 0.003446
-19 -86 12 3.253414 0.001560
-19 -88 12 2.740635 0.007276
-18 -87 12 2.849355 0.005330
-18 -86 12 3.070099 0.002762
-18 -88 12 2.628609 0.009940
-18 -87 13 2.817934 0.005836
-17 -87 12 2.701686 0.008118
-17 -86 12 2.886786 0.004779
-17 -87 13 2.684627 0.008514
-17 -86 13 2.814191 0.005900
-17 -86 14 2.741596 0.007256
-18 -86 13 3.008605 0.003328
-18 -85 13 2.789165 0.006339
-18 -86 14 2.947112 0.004000
-19 -86 13 3.203021 0.001830
-19 -85 13 3.023473 0.003182
-19 -84 13 2.843923 0.005414
-19 -85 14 2.905767 0.004520
-19 -85 12 3.141180 0.002219
-20 -85 13 2.748145 0.007123
-20 -85 14 2.627229 0.009977
-20 -85 12 2.869061 0.005033
-20 -84 12 2.766794 0.006756
-20 -83 12 2.664528 0.009002
-19 -84 12 3.028944 0.003130
-19 -83 12 2.916711 0.004377
-18 -84 12 2.738887 0.007312
-18 -85 12 2.904494 0.004537
-17 -85 12 2.667809 0.008921
-19 -82 12 2.845806 0.005385
-19 -83 13 2.664375 0.009006
-19 -81 12 2.774900 0.006602
-19 -80 12 2.703996 0.008066
-19 -79 12 2.943695 0.004041
-19 -78 12 3.183397 0.001946
-18 -79 12 2.648442 0.009412
-18 -78 12 2.851758 0.005293
-18 -77 12 3.055071 0.002891
-18 -77 13 2.634837 0.009771
-17 -77 12 2.687048 0.008456
-19 -77 12 3.423096 0.000902
-19 -76 12 2.653846 0.009272
-19 -77 13 2.763680 0.006816
-19 -77 11 2.878067 0.004902
-20 -77 12 2.686200 0.008476
-19 -85 11 2.634984 0.009767
-19 -86 11 2.663219 0.009035
-19 -84 14 2.658902 0.009144
-19 -85 15 2.788060 0.006359
-18 -85 14 2.673836 0.008773
-19 -85 16 2.922503 0.004303
-19 -86 16 3.331226 0.001216
-19 -85 17 3.056946 0.002875
-18 -85 16 2.667140 0.008938
-20 -85 16 2.680586 0.008610
-20 -86 16 3.001582 0.003399
-20 -85 17 2.854859 0.005245
-20 -86 17 3.235661 0.001651
-20 -85 18 3.029134 0.003128
-21 -85 17 2.652774 0.009300
-21 -86 17 2.911110 0.004449
-21 -85 18 2.866879 0.005065
-22 -85 18 2.704623 0.008051
-23 -85 18 2.856247 0.005224
-24 -85 18 3.007870 0.003336
-25 -85 18 3.159495 0.002097
-26 -85 18 2.966506 0.003776
-27 -85 18 2.773515 0.006628
-21 -86 16 2.671940 0.008819
-20 -86 18 3.469741 0.000773
-20 -85 19 2.870591 0.005010
-19 -85 18 3.191389 0.001898
-19 -86 18 3.789203 0.000260
-19 -85 19 3.041268 0.003015
-18 -85 18 2.884405 0.004812
-18 -86 18 3.448547 0.000829
-18 -85 19 2.798581 0.006170
-18 -85 17 2.775772 0.006586
-18 -86 17 3.260904 0.001524
-18 -86 16 3.073262 0.002735
-17 -86 17 2.961596 0.003831
-19 -86 17 3.560214 0.000571
-17 -86 18 3.107893 0.002460
-17 -86 16 2.815299 0.005881
-16 -86 17 2.662286 0.009058
-16 -86 18 2.767237 0.006748
-16 -87 18 2.919381 0.004342
-16 -86 19 2.837454 0.005517
-16 -87 19 2.850298 0.005315
-17 -86 19 3.110574 0.002440
-17 -87 19 3.044753 0.002984
-18 -86 19 3.383693 0.001026
-18 -87 19 3.239206 0.001632
-19 -86 19 3.656814 0.000411
-19 -87 19 3.433661 0.000871
-19 -88 19 3.210506 0.001787
-19 -87 20 3.151117 0.002152
-19 -87 18 3.716207 0.000335
-20 -87 19 3.184658 0.001938
-20 -88 19 3.034222 0.003080
-20 -87 20 2.928611 0.004226
-20 -87 18 3.440707 0.000851
-21 -87 18 3.165209 0.002060
-22 -87 18 2.889709 0.004738
-23 -87 18 3.007653 0.003338
-24 -87 18 3.125597 0.002329
-25 -87 18 3.243542 0.001610
-26 -87 18 3.117534 0.002388
-27 -87 18 2.991524 0.003504
-20 -88 20 2.656775 0.009198
-19 -88 20 2.777805 0.006548
-18 -88 20 2.736789 0.007355
-18 -87 20 3.027816 0.003141
-18 -88 19 3.094718 0.002561
-17 -88 20 2.695775 0.008253
-17 -87 20 2.904516 0.004537
-17 -88 19 2.978930 0.003638
-16 -88 20 2.654759 0.009249
-16 -87 20 2.781216 0.006484
-16 -88 19 2.863142 0.005120
-16 -89 19 2.875986 0.004932
-16 -90 19 2.693782 0.008299
-16 -89 18 3.223671 0.001714
-17 -89 19 2.913109 0.004423
-17 -90 19 2.639876 0.009637
-17 -89 18 3.339185 0.001185
-18 -89 19 2.950231 0.003963
[truncated: 6,198 more rows]
